# Supplementary material for: In Vitro One-Pot 3-Hydroxypropanal Production from Cheap C1 and C2 Compounds
Source: MDPI journal article supplement (doi:10.3390/ijms23073990), 2022-04-03
Supplement: s1 [file s1]

## Supplementary data

### ***In vitro* one-pot 3-hydroxypropanal production from cheap C1 and C2 compounds**

Su-bin Ju<sup>1,2†</sup>, Min-Ju Seo<sup>2†</sup>, and Soo-Jin Yeom<sup>1,2\*</sup>

<sup>1</sup> School of Biological Sciences and Biotechnology, Graduate School, Chonnam National University, Yong-bong-ro 77, Gwangju 61186, Republic of Korea

<sup>2</sup> School of Biological Sciences and Technology, Chonnam National University, Gwangju 61186, Republic of Korea

† These authors contributed equally to this work

\* Correspondence: Soo-Jin Yeom [soojin285@chonnam.ac.kr](mailto:soojin285@chonnam.ac.kr)

**Table S1.** Strain, plasmids, and primers used in this study

| Name                                                                             | Relevant genotype or description                                                                                                                           | Source     |
|----------------------------------------------------------------------------------|------------------------------------------------------------------------------------------------------------------------------------------------------------|------------|
| Bacterial strain                                                                 |                                                                                                                                                            |            |
| <i>E. coli</i> C2566                                                             | <i>fhuA2 lacZ::T7 gene1 [lon] ompT gal sulA11 R(mcr-73::miniTn10--Tet<sup>S</sup>)2 [dcm] R(zgb-210::Tn10--Tet<sup>S</sup>) endA1 Δ(mcrC-mrr)114::IS10</i> | Enzymomics |
| Plasmid                                                                          |                                                                                                                                                            |            |
| pET-28a(+)                                                                       | <i>E. coli</i> expression vector, Kan <sup>R</sup> , T7 promoter                                                                                           | Lab stock  |
| pMDH <sub>Lx</sub> K46E                                                          | pET-28a(+) containing MDH <sub>Lx</sub> K46E variant                                                                                                       | Lab stock  |
| pMDH <sub>Lx</sub> A164F                                                         | pET-28a(+) containing MDH <sub>Lx</sub> A164F variant                                                                                                      | Lab stock  |
| pMDH <sub>Lx</sub> K318N                                                         | pET-28a(+) containing MDH <sub>Lx</sub> K318N variant                                                                                                      | Lab stock  |
| pMDH <sub>Lx</sub> K46E-A164F                                                    | pET-28a(+) containing MDH <sub>Lx</sub> K46E-A164F double variant                                                                                          | This study |
| pMDH <sub>Lx</sub> A164F-K318N                                                   | pET-28a(+) containing MDH <sub>Lx</sub> A164F-K318N double variant                                                                                         | This study |
| pDERA <sub>Tma</sub>                                                             | pET-28a(+) containing DERA <sub>Tma</sub>                                                                                                                  | This study |
| Oligonucleotides used for PCR (5'–3')                                            |                                                                                                                                                            |            |
| DERA <sub>Tma</sub>                                                              | (F)-gtgccgcgcggcagccatgatgatgaataaccgtatcg<br>(R)-gggtgtgctcgagttaaccaccgtaacgttc                                                                          | This study |
| Oligonucleotides used for site-directed mutagenesis of MDH <sub>Lx</sub> (5'–3') |                                                                                                                                                            |            |
| A164F                                                                            | (F)-acagctcgtaaagtgaagat <b>gttc</b> atcggtggacaaacatgttac<br>(R)-gtaacatgtttgtccacgat <b>gaac</b> atcttcactttacgagctgt                                    | This study |
| * Mutagenized codons are highlighted in italic and bold.                         |                                                                                                                                                            |            |

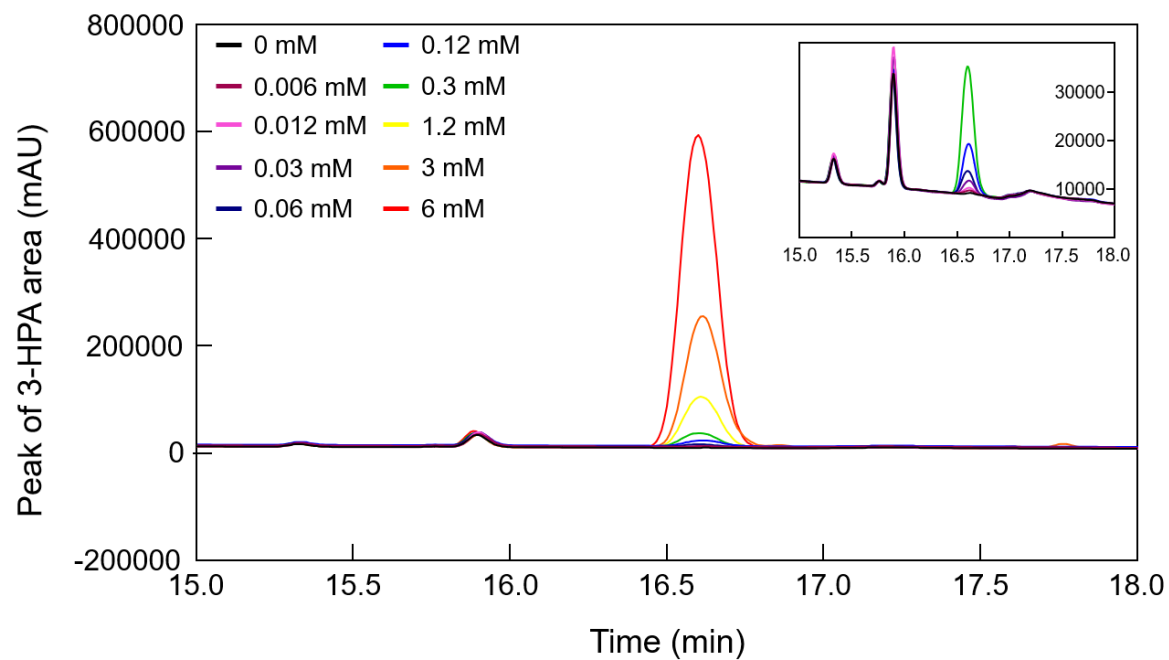

**Figure S1.** HPLC chromatography of 3-HPA after derivatization with *O*-benzylhydroxylamine.

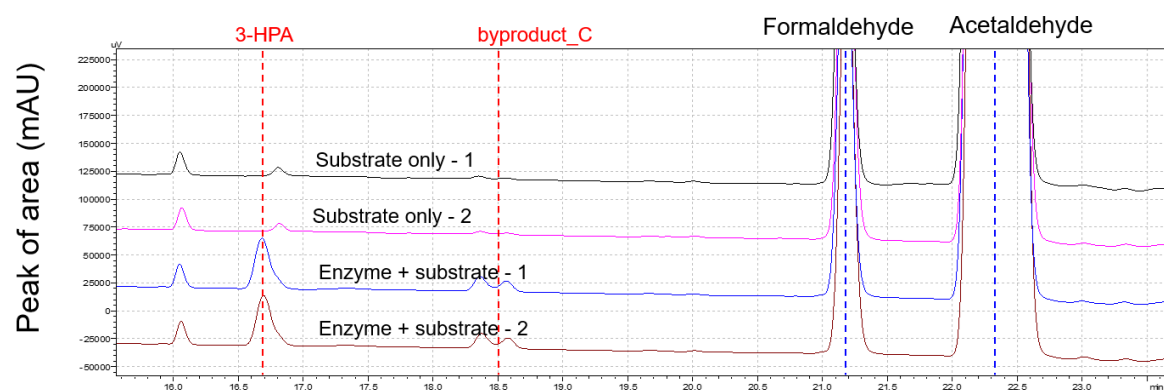

**Figure S2.** HPLC chromatography of 3-HPA derivatives, formaldehyde, and acetaldehyde.

(a)

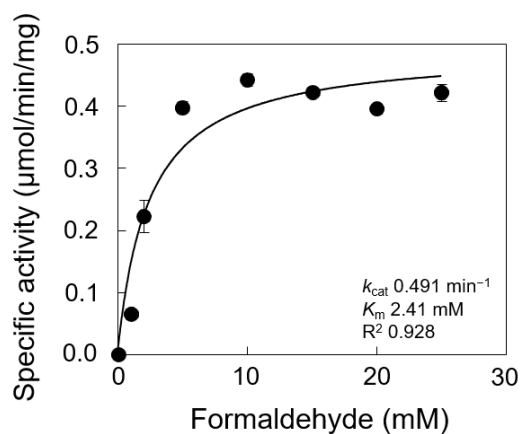

(b)

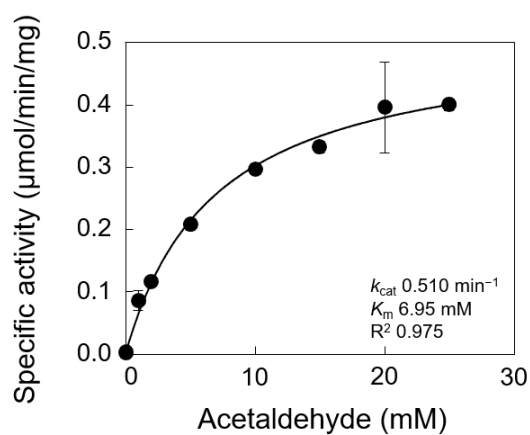

**Figure S3.** Kinetic parameters of DERA<sub>Tma</sub>. (a) Kinetic parameter of DERA<sub>Tma</sub> toward formaldehyde. (b) Kinetic parameter of DERA<sub>Tma</sub> toward acetaldehyde. The reactions were performed in 20 mM Kpi buffer (pH 7.0) containing 0.5 mg/mL enzyme and various concentration of substrates for 10 min at 40 °C. Data represent the means of two separate experiments, and error bars represent the standard deviation.

(a)

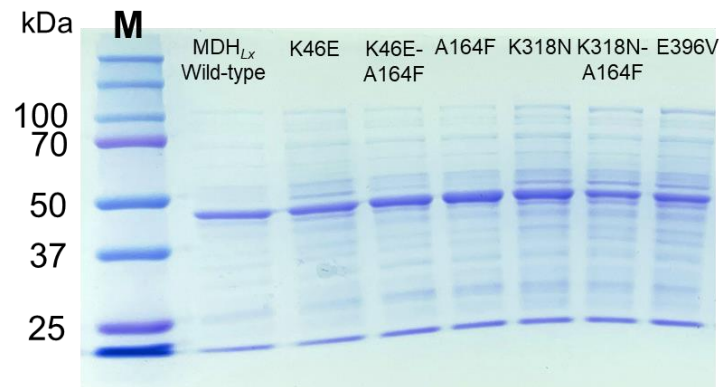

(b)

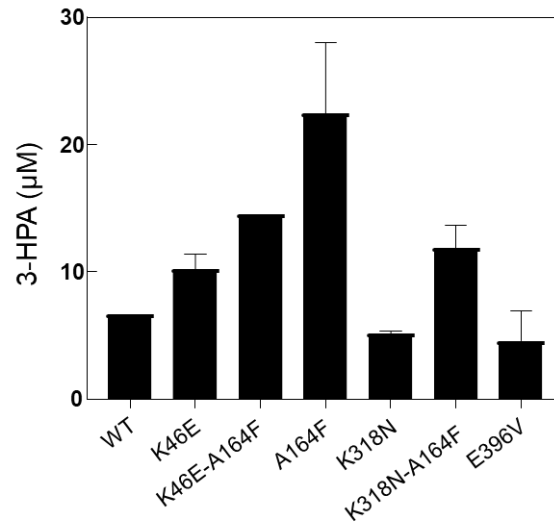

**Figure S4.** SDS-PAGE analysis and activity test of the wild type MDH<sub>Lx</sub> and its variants. (a) SDS-PAGE analysis of the purified MDH<sub>Lx</sub> and its variants (48 kDa). Pre-stained marker protein (250, 150, 100, 70, 50, 37, and 25 kDa) and purified enzymes were loaded. (b) Comparison of enzyme activities with MDH<sub>Lx</sub> and its variants. The reactions were performed in 20 mM Kpi buffer (pH 7.0) containing 2.22 U/mL DERA<sub>Tma</sub>, 0.01 U/mL MDH<sub>Lx</sub> and its variants, 1 M methanol, 1M ethanol, 5 mM Mg<sup>2+</sup>, and 3 mM NAD<sup>+</sup> at 45 °C for 120 min. Data represent the means of two separate experiments, and error bars represent the standard deviation.

**A**

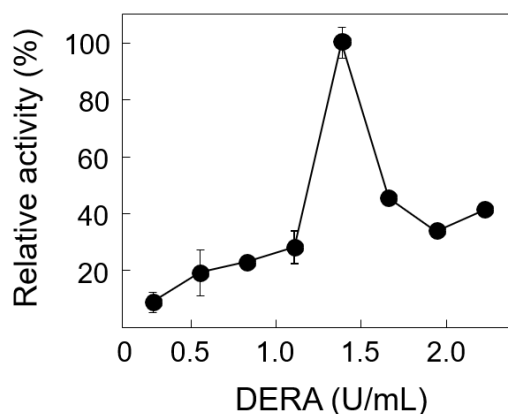

**B**

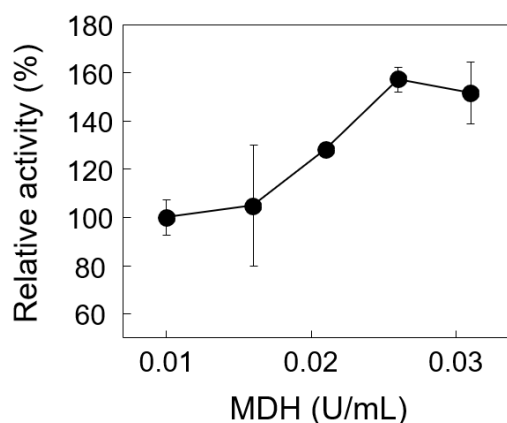

**Figure S5.** Effect of enzyme concentration for 3-HPA production. (A) Effect of DERA<sub>Tma</sub> concentration. (B) Effect of MDH<sub>Lx</sub> A164F concentration. The reactions were conducted in 20 mM Kpi buffer (pH 7.0) containing 1 M methanol, 1M ethanol, 5 mM Mg<sup>2+</sup>, 3 mM NAD<sup>+</sup>, and different concentration of enzymes at 45 °C for 120 min. Data represent the means of two separate experiments, and error bars represent the standard deviation.
